# Supplementary material
Source: PubMed Central journal article supplement (PMC3615249)
Supplement: NIHMS451504-supplement-02.pdf [file NIHMS451504-supplement-02.pdf]

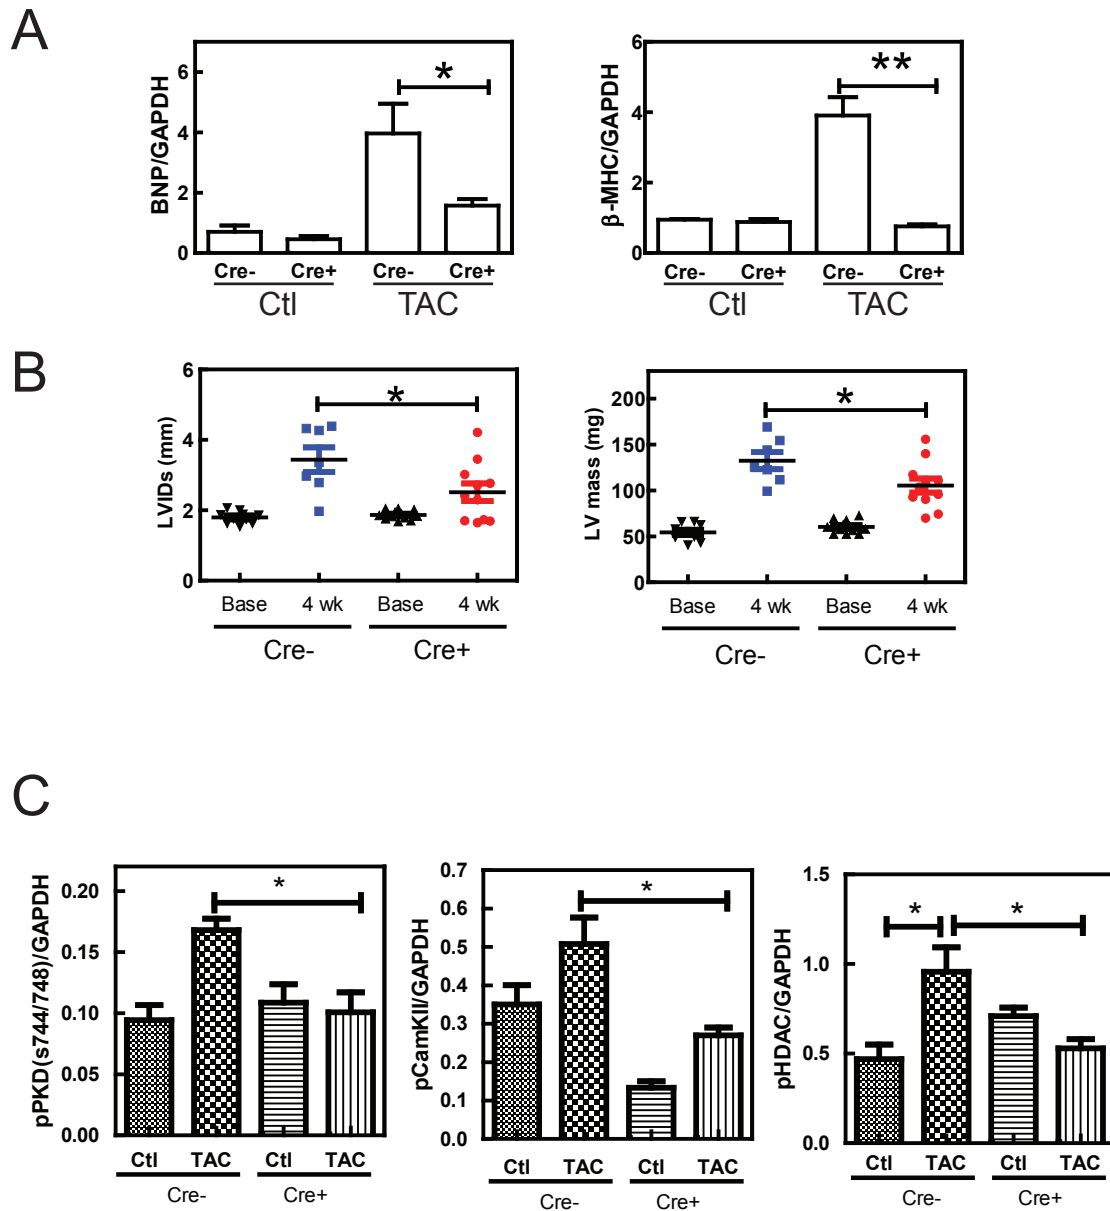

Figure S1 related to Figure1

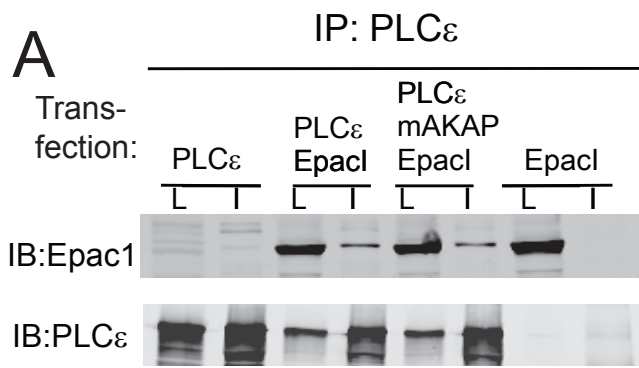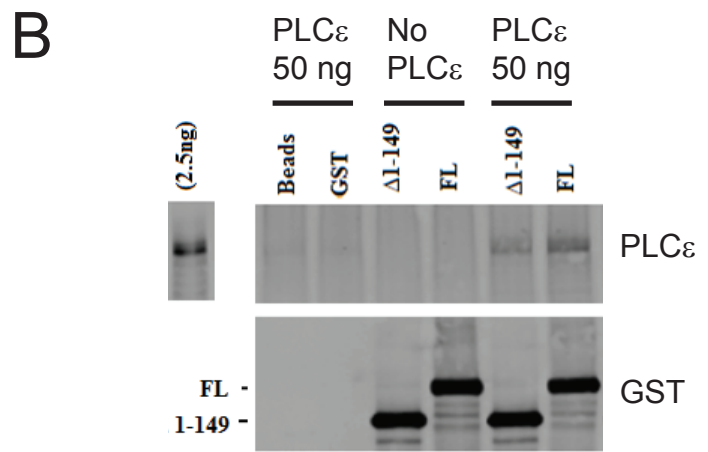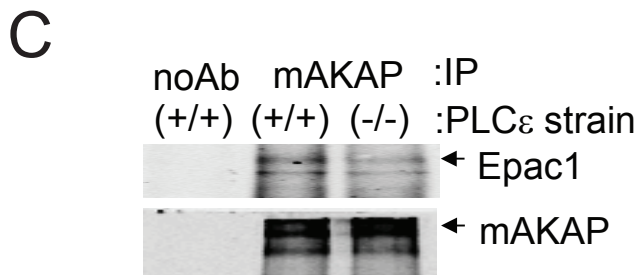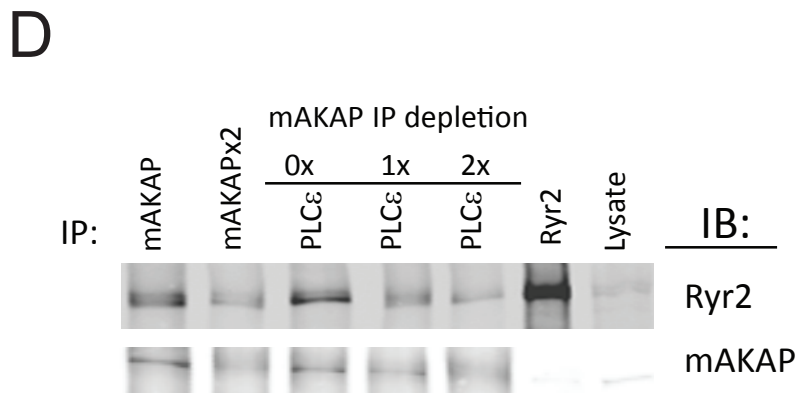

Figure S2 related to Figure 3



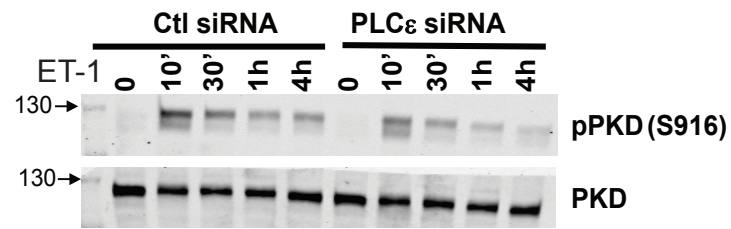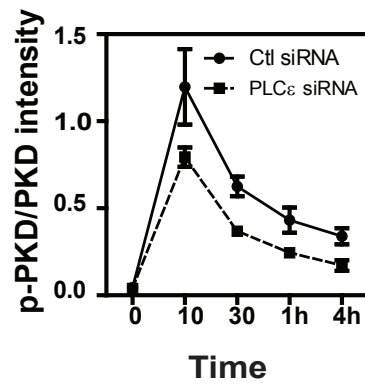

Figure S3 related to Figure 4

**A**

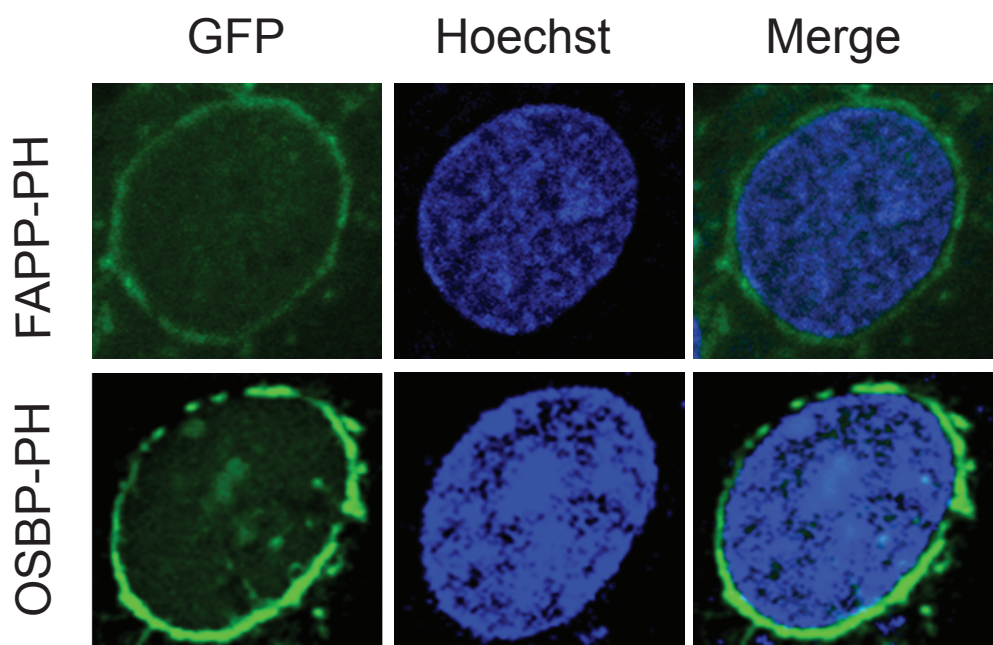

**B**

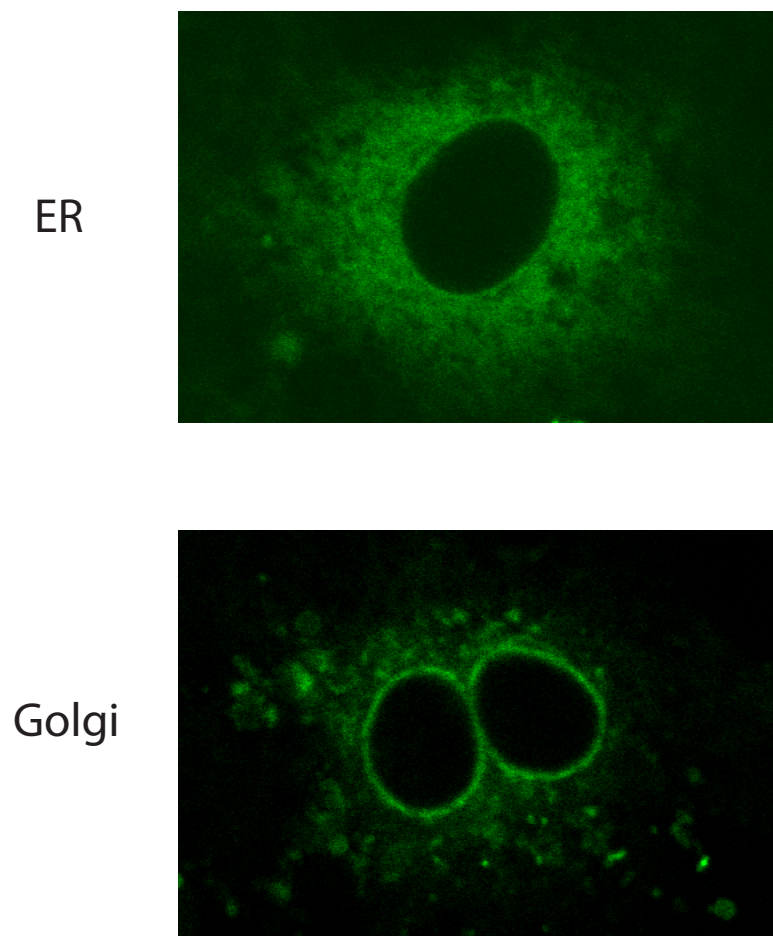

Figure S4 related to Figure 6

A

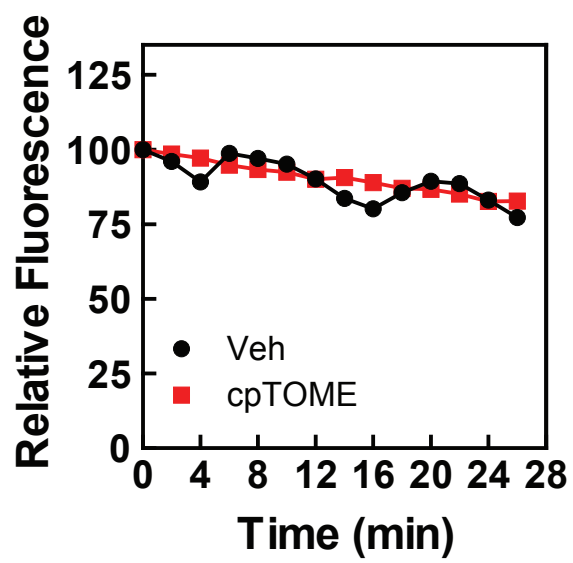

B

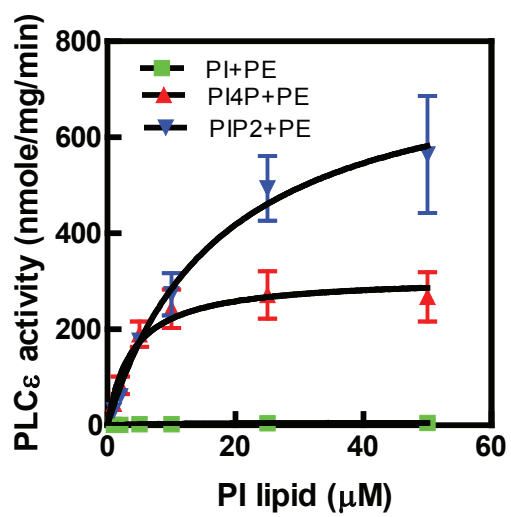

Figure S5 related to Figure 7

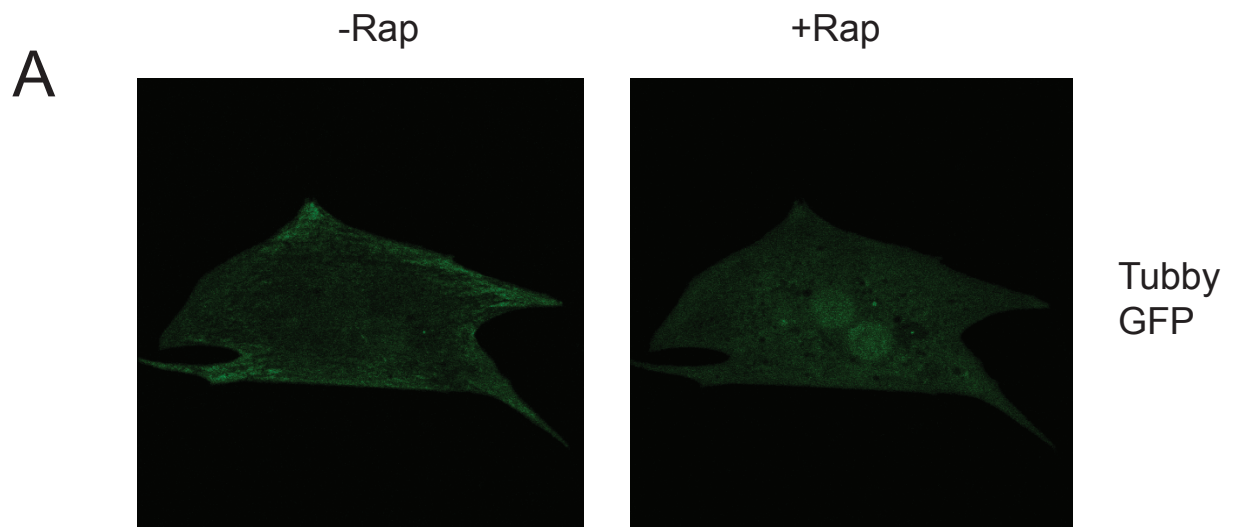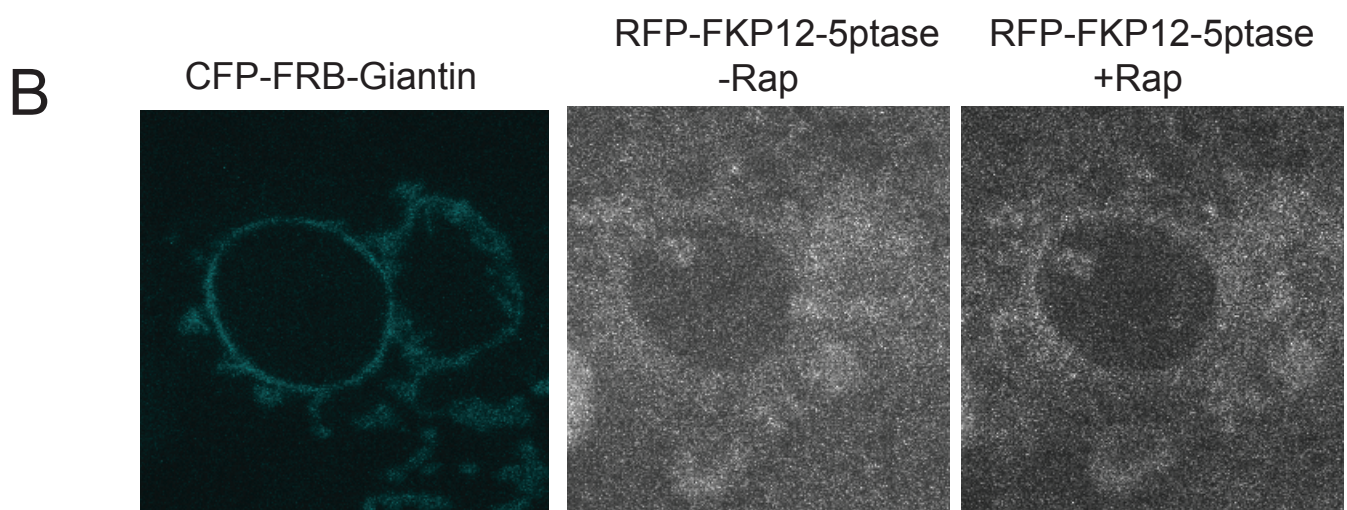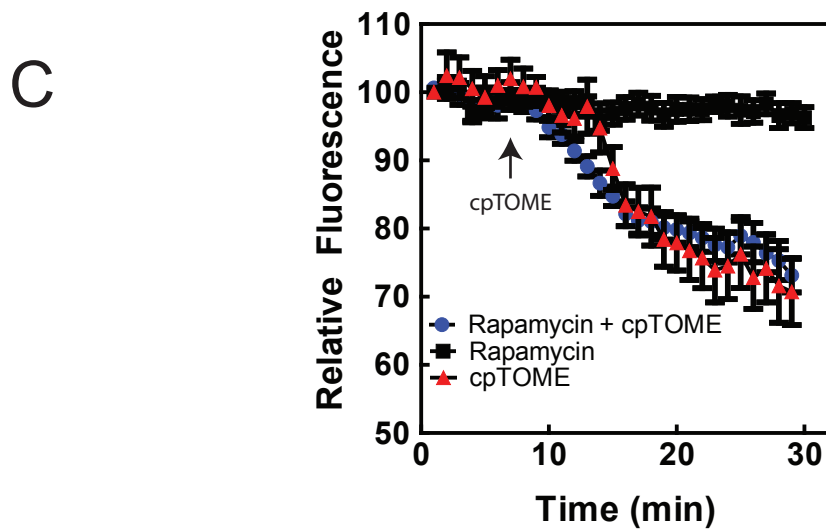

Figure S6 related to  
Figure 7

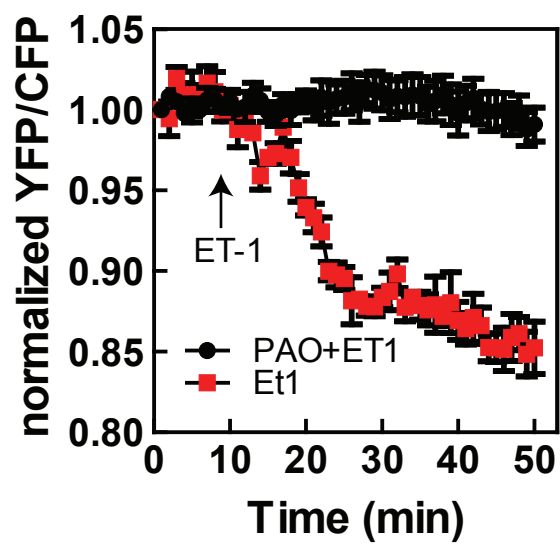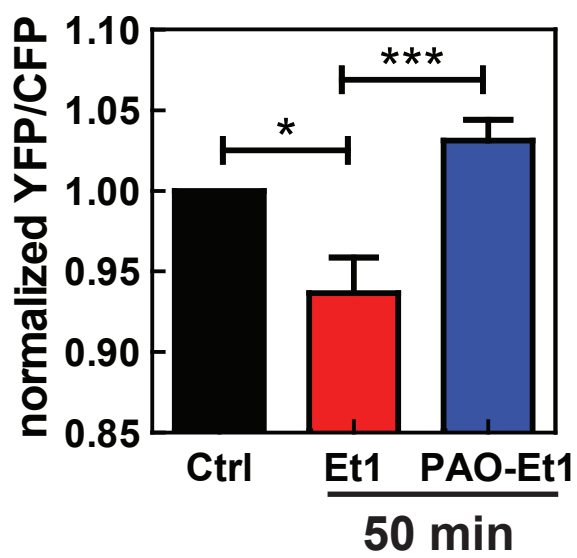

Figure S7 related to Figure 7
